# Supplementary material for: Family Structure and Family Climate in Relation to Health and Socioeconomic Status for Older Adults: A Longitudinal Moderated Mediation Analysis
Source: MDPI journal article supplement (doi:10.3390/ijerph191811840), 2022-09-19
Supplement: s1 [file s1]

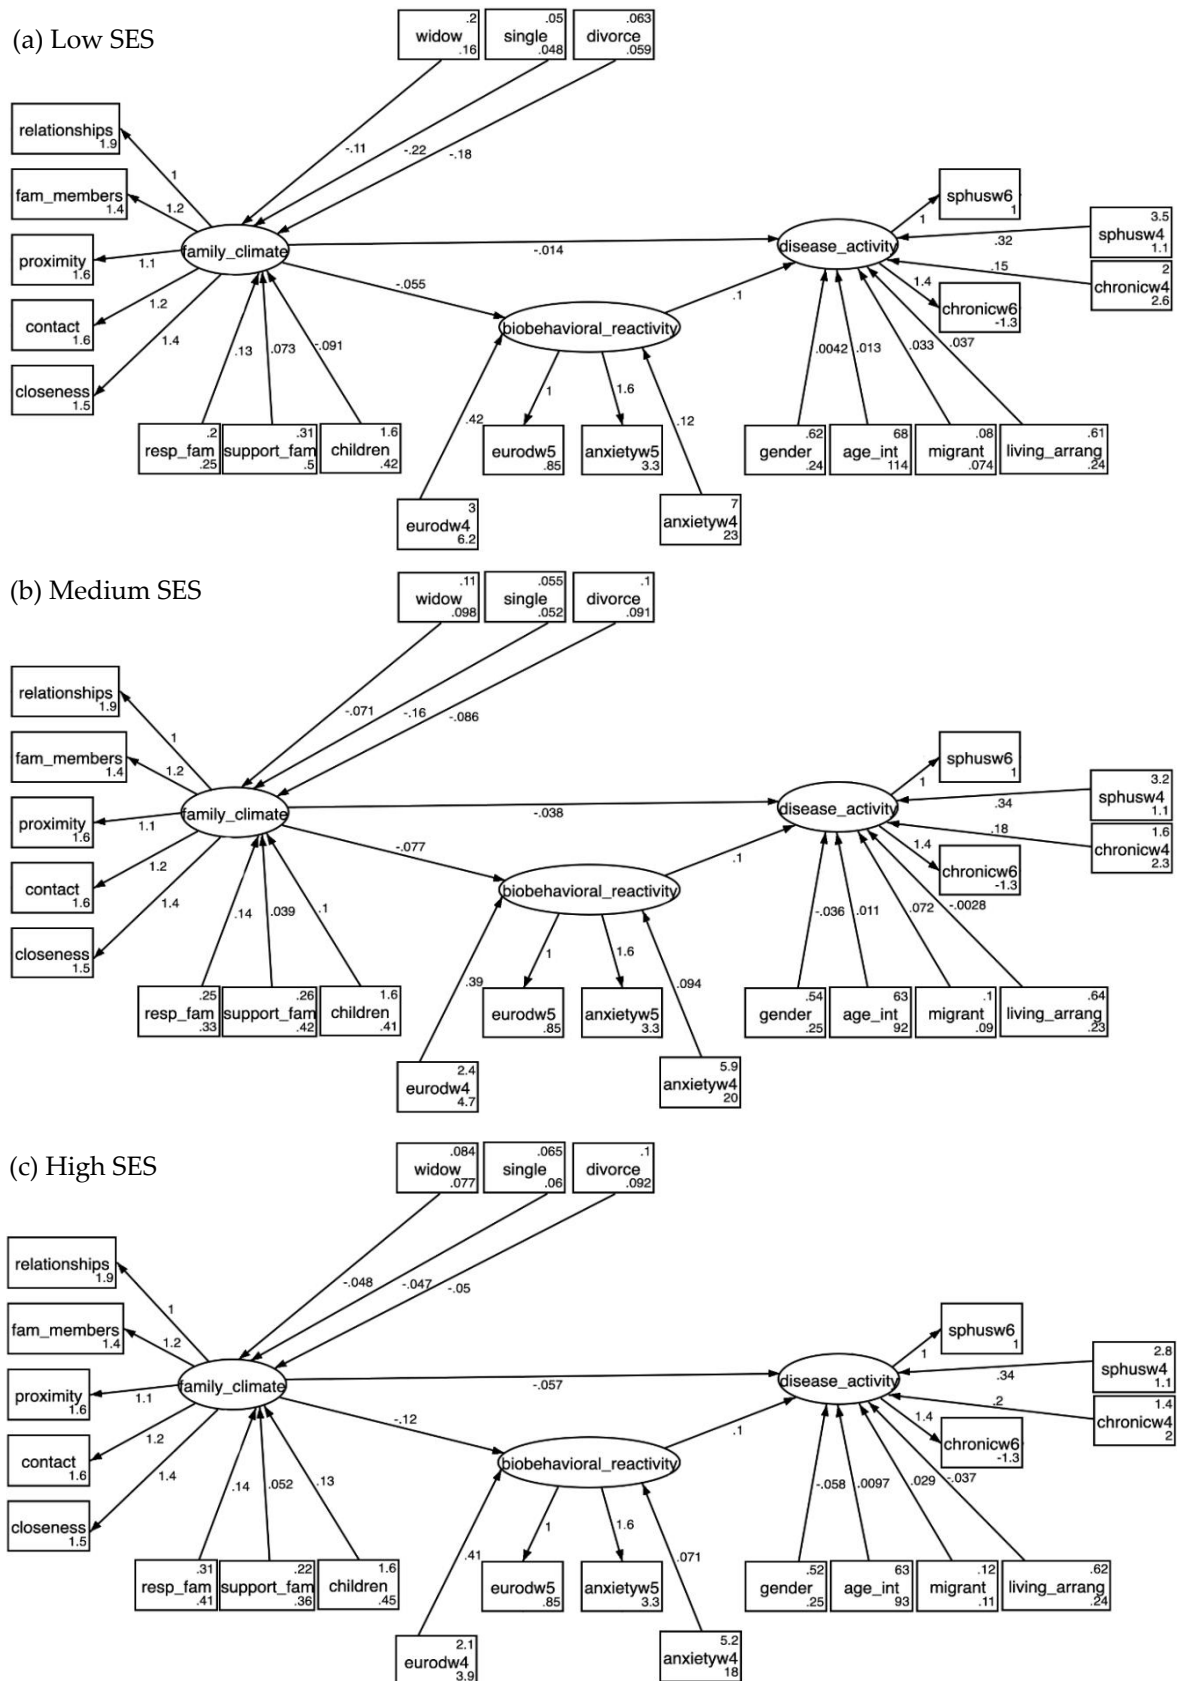

**Figure S1.** Multigroup structural equation modelling showing the moderated mediation analysis, by group of SES level.

**Table S1.** Correlation matrix amongst the key manifest variables throughout the three measurement points ( $n = 29,457$ ).

| Variables                      | 1       | 2       | 3       | 4       | 5       | 6       | 7       | 8       | 9       | 10     | 11     | 12     | 13    |
|--------------------------------|---------|---------|---------|---------|---------|---------|---------|---------|---------|--------|--------|--------|-------|
| <b>Family structure T1</b>     |         |         |         |         |         |         |         |         |         |        |        |        |       |
| 1. Widowed                     | 1.000   |         |         |         |         |         |         |         |         |        |        |        |       |
| 2. Divorced                    | -0.097* | 1.000   |         |         |         |         |         |         |         |        |        |        |       |
| 3. Single                      | -0.123* | -0.073* | 1.000   |         |         |         |         |         |         |        |        |        |       |
| 4. Relationship                | -0.595* | -0.443* | -0.350* | 1.000   |         |         |         |         |         |        |        |        |       |
| <b>Family climate T2</b>       |         |         |         |         |         |         |         |         |         |        |        |        |       |
| 5. Family members              | -0.049* | -0.078* | -0.113* | 0.140*  | 1.000   |         |         |         |         |        |        |        |       |
| 6. Proximity                   | -0.042* | -0.022* | -0.045* | 0.069*  | 0.570*  | 1.000   |         |         |         |        |        |        |       |
| 7. Contact                     | -0.026* | -0.014* | -0.059* | 0.058*  | 0.686*  | 0.745*  | 1.000   |         |         |        |        |        |       |
| 8. Closeness                   | -0.037* | -0.009* | -0.059* | 0.060*  | 0.709*  | 0.640*  | 0.744*  | 1.000   |         |        |        |        |       |
| 9. Relationships               | 0.086*  | 0.012*  | 0.034*  | -0.084* | 0.682*  | 0.381*  | 0.453*  | 0.469*  | 1.000   |        |        |        |       |
| <b>Biobehavioral React. T2</b> |         |         |         |         |         |         |         |         |         |        |        |        |       |
| 10. Depression T2              | 0.103*  | 0.012*  | 0.002   | -0.076* | -0.041* | -0.021* | -0.028* | -0.049* | 0.012*  | 1.000  |        |        |       |
| 11. Anxiety T2                 | 0.073*  | 0.001*  | 0.016*  | -0.035* | -0.022* | -0.003  | -0.020* | -0.044* | -0.006* | 0.517* | 1.000  |        |       |
| <b>Disease Activity T3</b>     |         |         |         |         |         |         |         |         |         |        |        |        |       |
| 12. Self-rated health T3       | 0.113*  | 0.023*  | -0.002  | -0.061* | -0.032* | -0.053* | -0.064* | -0.100* | -0.013* | 0.440* | 0.291* | 1.000  |       |
| 13. Chronic diseases T3        | 0.118*  | 0.021*  | -0.025* | -0.059* | -0.004* | 0.003   | -0.011* | -0.020* | 0.014*  | 0.292* | 0.237* | 0.487* | 1.000 |

Note: Pearson correlation coefficients; T1 = wave 4, 2011; T2 = wave 5, 2013; T3 = wave 6, 2015; \*coefficients with  $p < 0.05$

**Table S2.** Correlation matrix between family structure and the key latent variables throughout the three measurement points ( $n = 29,457$ ).

| Variables                         | 1       | 2       | 3       | 4       | 5       | 6      | 7     |
|-----------------------------------|---------|---------|---------|---------|---------|--------|-------|
| <b>Family structure T1</b>        |         |         |         |         |         |        |       |
| 1. Widowed                        | 1.000   |         |         |         |         |        |       |
| 2. Divorced                       | -0.097* | 1.000   |         |         |         |        |       |
| 3. Single                         | -0.123* | -0.073* | 1.000   |         |         |        |       |
| 4. Relationship                   | -0.595* | -0.443* | -0.350* | 1.000   |         |        |       |
| <b>5. Family climate T2</b>       | -0.028* | -0.086* | -0.032* | 0.525*  | 1.000   |        |       |
| <b>6. Biobehavioral React. T2</b> | 0.078*  | 0.002*  | 0.012*  | -0.020* | -0.026* | 1.000  |       |
| <b>7. Disease Activity T3</b>     | 0.163*  | 0.008*  | 0.017   | -0.013* | -0.025* | 0.257* | 1.000 |

Note: Pearson correlation coefficients; T1 = wave 4, 2011; T2 = wave 5, 2013; T3 = wave 6, 2015; \*coefficients with  $p < 0.05$
